# Supplementary material for: Formation mechanism of silver nanoparticle 1D microstructures and their hierarchical assembly into 3D superstructures
Source: Royal Society of Chemistry journal article supplement (doi:10.1039/b9nr00072k), 2009-10-07
Supplement: b9nr00072k.pdf [file b9nr00072k.pdf]

Supporting Information for “Formation Mechanism of Silver Nano-Particle 1D Micro-  
Structures and their Hierarchic Assembly into 3D Superstructures” by Lorenza Suber and William  
R. Plunkett

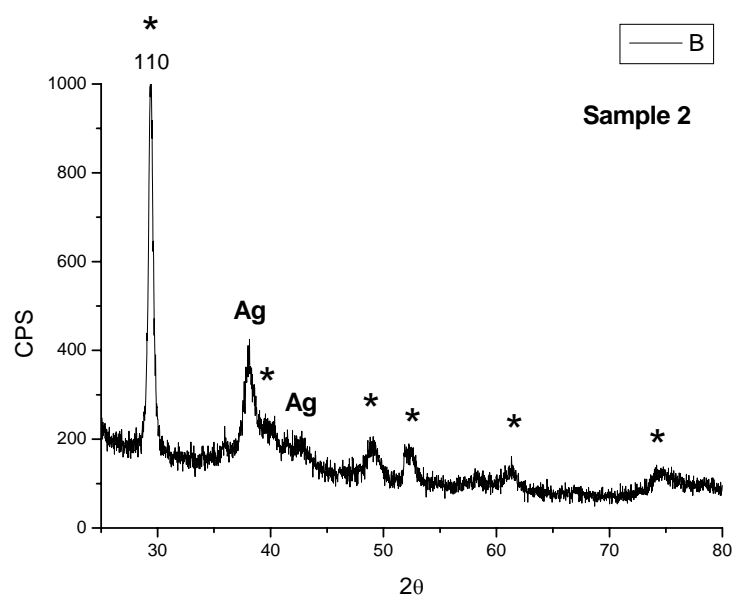

Figure a: XRD spectrum of Sample 2 (linear particle aggregates). The peaks marked with \* are attributed to the AgCN rhombohedral structure (JCPDS 23-1404).

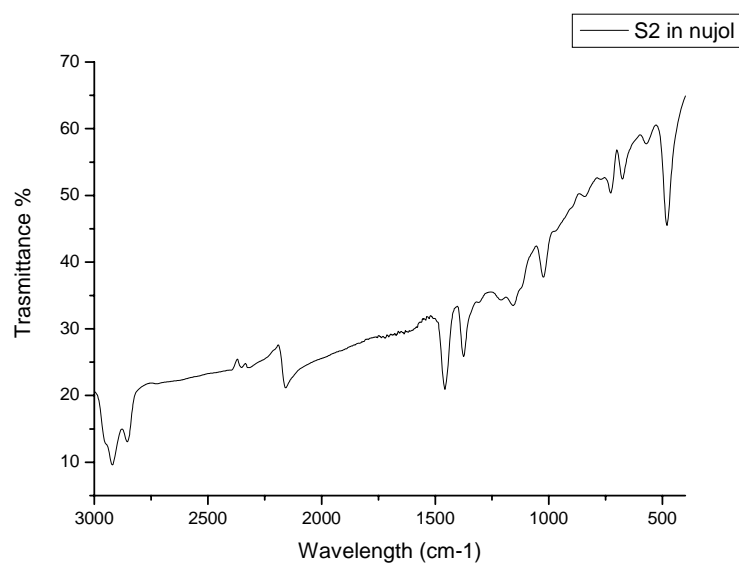

Figure b: IR spectrum of Sample 2 in Nujol.

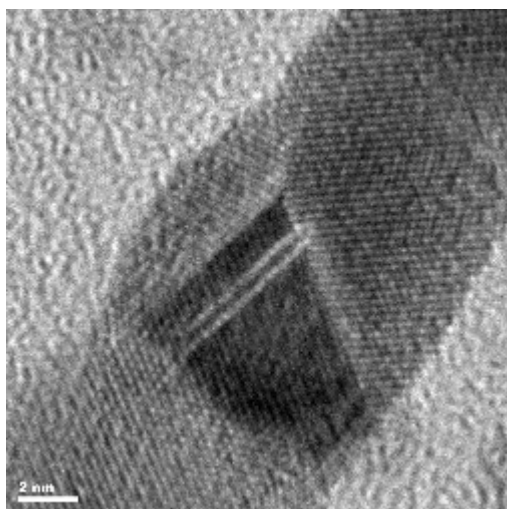

Figure c: HR-TEM micrograph of Sample 2 showing linearly aggregated silver particles into the polymer sheath. The bar size is 2nm.

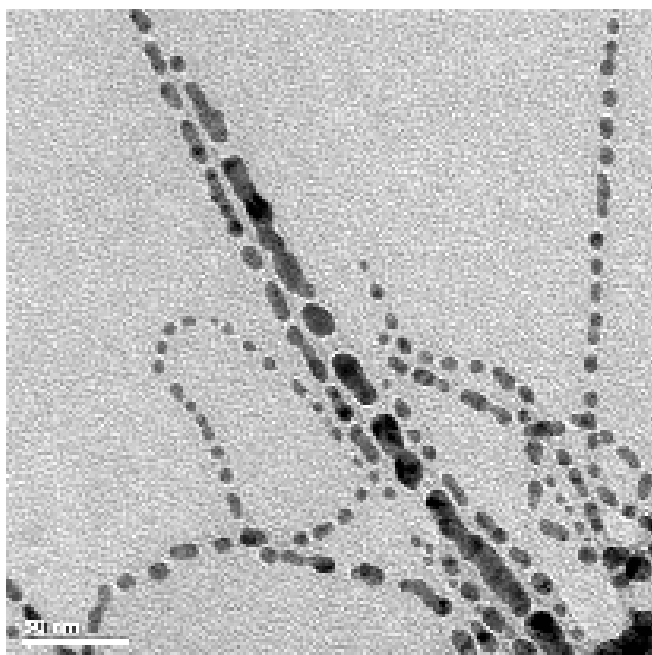

Figure d: TEM micrograph on sample 2 showing linearly aggregated silver particles.  
The bar size is 50nm.

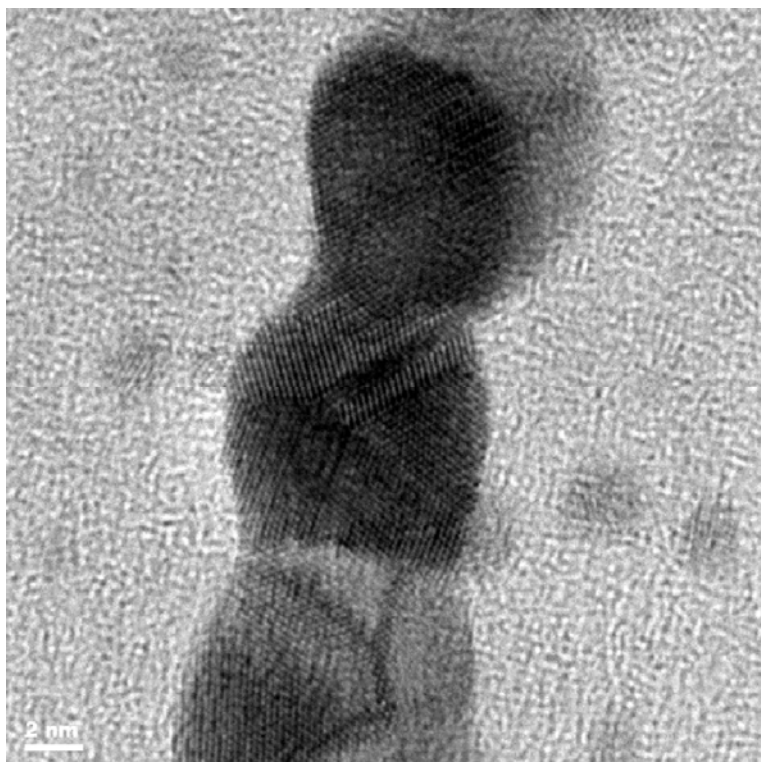

Figure e: HR-TEM micrograph of sample 2 showing linearly aggregated silver particles.  
The bar size is 2nm.

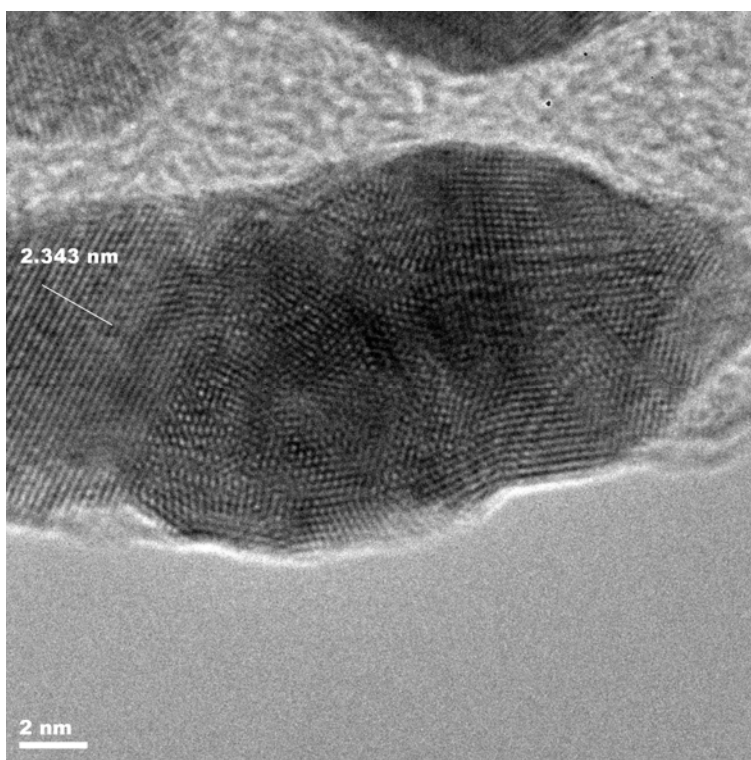

Figure f: HR-TEM of Sample 2 showing (111) silver lattice fringes.

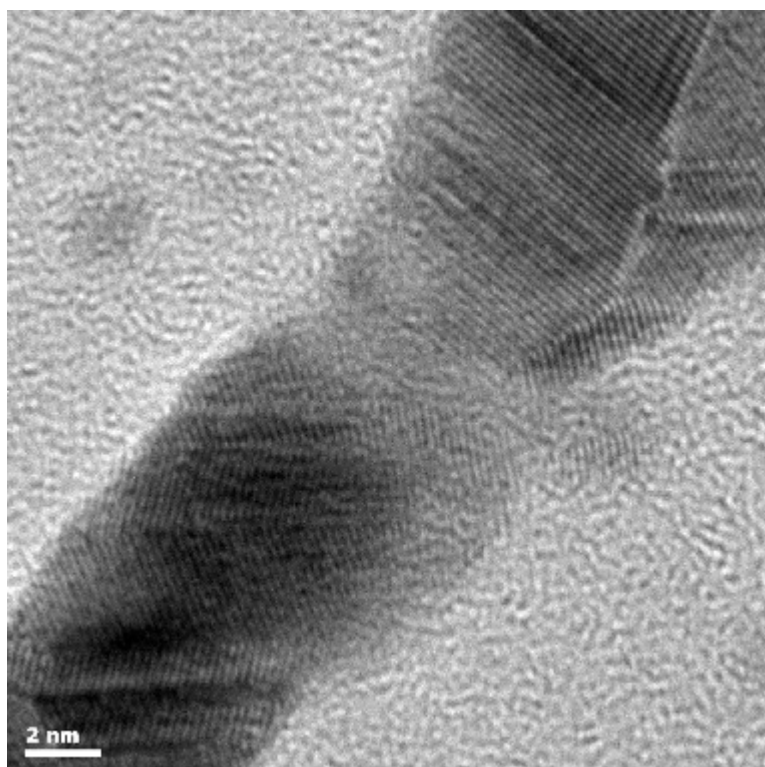

Figure g: HR-TEM micrograph of Sample 2 showing linearly aggregated silver particles.
